# Supplementary figures and images for: Porous Diatomite‐Immobilized Cu–Ni Bimetallic Nanocatalysts for Direct Synthesis of Dimethyl Carbonate
Source: Hindawi journal article supplement (doi:10.1155/2012/610410), 2011-10-24

**Figure SM1**

**
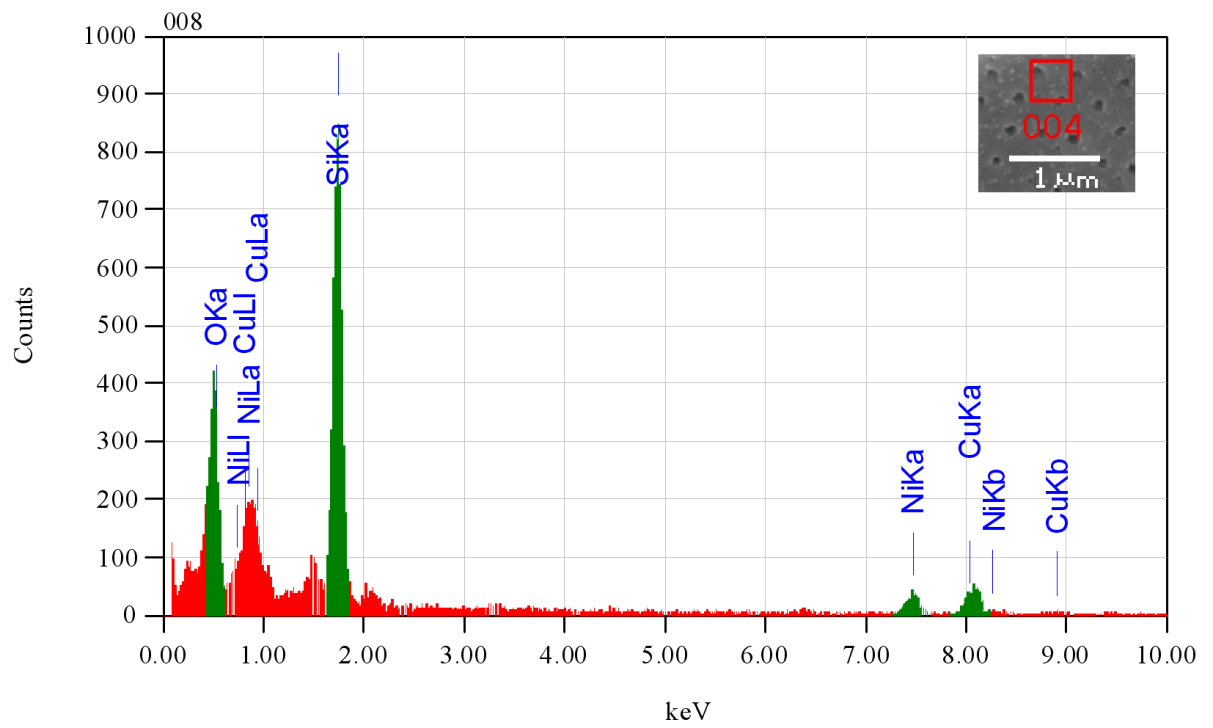
**

Supplement: f1 [file 610410.f1.docx]
